# Supplementary material for: Isolation and Identification of <em>Alternaria alternata</em> from Potato Leaf Spot Disease in Korea: Selection of Effective Fungicides
Source: Preprints.org preprint supplement (doi:10.20944/preprints202312.1563.v1), 2023-12-21
Supplement: Supplementary file 1 [file supplementary]

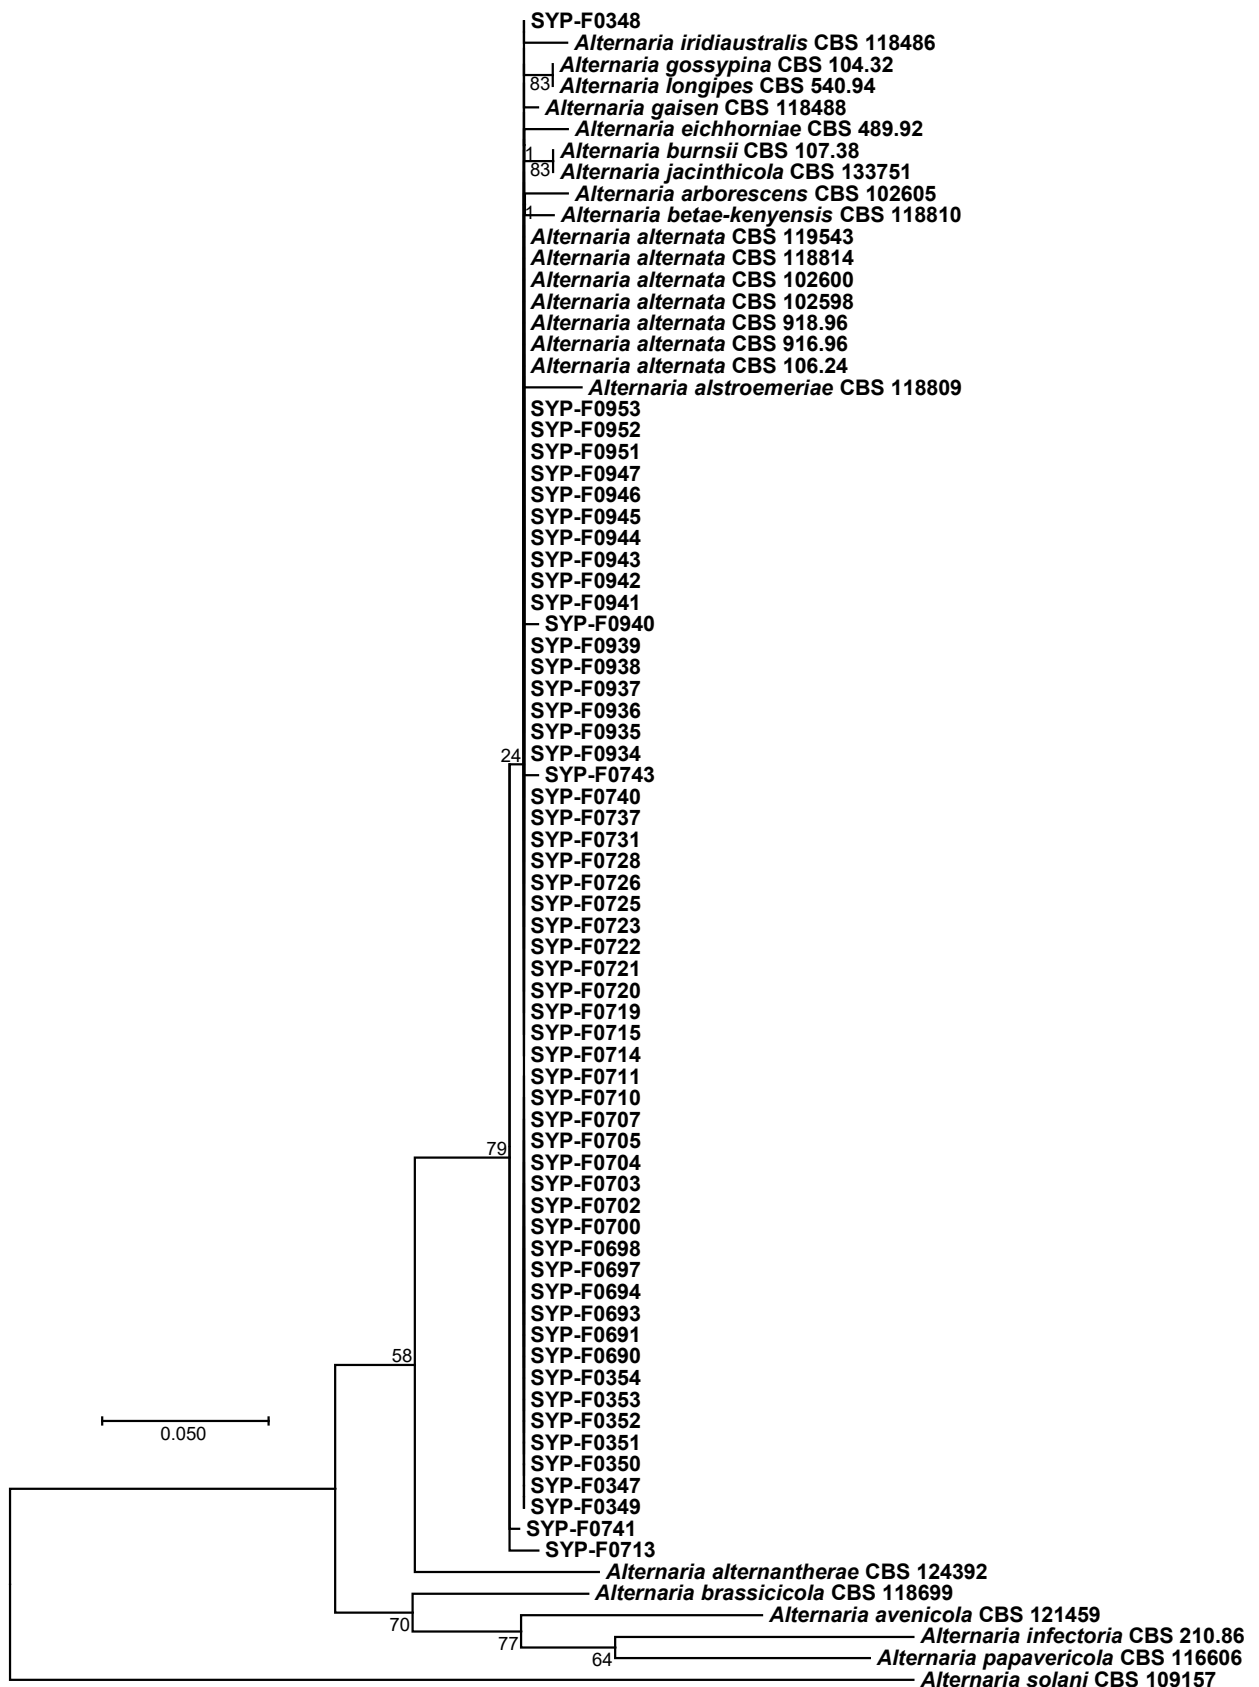

**Supplementary Figure 3.** Phylogenetic tree constructed based on the *tef1* gene of the *Alternaria* spp. isolates and reference sequences retrieved from GenBank (accession numbers shown in Supplementary Table 1). The tree was constructed by maximum-likelihood, and bootstrap values (1,000 replications) are shown in front of each node. MEGA X was used for the analysis.
